# Supplementary material for: Chromosomal-level assembly of yellow catfish genome using third-generation DNA sequencing and Hi-C analysis
Source: PubMed Central journal article supplement (PMC6228179; doi:10.1093/gigascience/giy120), 2018-09-20

## Chromosomal-level assembly of yellow catfish genome using third-generation DNA sequencing and Hi-C analysis --Manuscript Draft--

|                                                      |                                                                                                                                                                                                                                                                                                                                                                                                                                                                                                                                                                                                                                                                                                                                                                                                                                                                                                                                                                                                                                                                                                                                                                                                                                                                                                                                                                                                                                                                                                                                                                                                                                                                                                                                                                                                                                                                                                                                                                                                                                                                                                                                                                                                                                                                              |             |
|------------------------------------------------------|------------------------------------------------------------------------------------------------------------------------------------------------------------------------------------------------------------------------------------------------------------------------------------------------------------------------------------------------------------------------------------------------------------------------------------------------------------------------------------------------------------------------------------------------------------------------------------------------------------------------------------------------------------------------------------------------------------------------------------------------------------------------------------------------------------------------------------------------------------------------------------------------------------------------------------------------------------------------------------------------------------------------------------------------------------------------------------------------------------------------------------------------------------------------------------------------------------------------------------------------------------------------------------------------------------------------------------------------------------------------------------------------------------------------------------------------------------------------------------------------------------------------------------------------------------------------------------------------------------------------------------------------------------------------------------------------------------------------------------------------------------------------------------------------------------------------------------------------------------------------------------------------------------------------------------------------------------------------------------------------------------------------------------------------------------------------------------------------------------------------------------------------------------------------------------------------------------------------------------------------------------------------------|-------------|
| <b>Manuscript Number:</b>                            | GIGA-D-18-00234R1                                                                                                                                                                                                                                                                                                                                                                                                                                                                                                                                                                                                                                                                                                                                                                                                                                                                                                                                                                                                                                                                                                                                                                                                                                                                                                                                                                                                                                                                                                                                                                                                                                                                                                                                                                                                                                                                                                                                                                                                                                                                                                                                                                                                                                                            |             |
| <b>Full Title:</b>                                   | Chromosomal-level assembly of yellow catfish genome using third-generation DNA sequencing and Hi-C analysis                                                                                                                                                                                                                                                                                                                                                                                                                                                                                                                                                                                                                                                                                                                                                                                                                                                                                                                                                                                                                                                                                                                                                                                                                                                                                                                                                                                                                                                                                                                                                                                                                                                                                                                                                                                                                                                                                                                                                                                                                                                                                                                                                                  |             |
| <b>Article Type:</b>                                 | Data Note                                                                                                                                                                                                                                                                                                                                                                                                                                                                                                                                                                                                                                                                                                                                                                                                                                                                                                                                                                                                                                                                                                                                                                                                                                                                                                                                                                                                                                                                                                                                                                                                                                                                                                                                                                                                                                                                                                                                                                                                                                                                                                                                                                                                                                                                    |             |
| <b>Funding Information:</b>                          | China Agriculture Research System (carS-46)                                                                                                                                                                                                                                                                                                                                                                                                                                                                                                                                                                                                                                                                                                                                                                                                                                                                                                                                                                                                                                                                                                                                                                                                                                                                                                                                                                                                                                                                                                                                                                                                                                                                                                                                                                                                                                                                                                                                                                                                                                                                                                                                                                                                                                  | Dr. Jie Mei |
|                                                      | the Fundamental Research Funds for the Central Universities (2662017PY013)                                                                                                                                                                                                                                                                                                                                                                                                                                                                                                                                                                                                                                                                                                                                                                                                                                                                                                                                                                                                                                                                                                                                                                                                                                                                                                                                                                                                                                                                                                                                                                                                                                                                                                                                                                                                                                                                                                                                                                                                                                                                                                                                                                                                   | Dr. Jie Mei |
| <b>Abstract:</b>                                     | <p><b>Background:</b> The yellow catfish, <i>Pelteobagrus fulvidraco</i>, belonging to Siluriformes order, is an economically important freshwater aquaculture fish species in Asia, especially in Southern China. The aquaculture industry has recently been facing tremendous challenges in germplasm degeneration and poor diseases resistance. As the yellow catfish exhibits notable sex dimorphism in growth, with adult males about two to three fold bigger than females, how aquaculture industry takes advantage of such sex dimorphism is another challenge. To address these issues, a high-quality reference genome of the yellow catfish would be a very useful resource.</p> <p><b>Finding:</b> To construct a high-quality reference genome for the yellow catfish, we generated 51.2 Gb short reads and 38.9 Gb long reads using Illumina and PacBio sequencing platforms, respectively. The sequencing data were assembled into a 732.8 Mb genome assembly with a contig N50 length of 1.1 Mb. Additionally, we applied Hi-C technology to identify contacts among contigs, which were then used to assemble contigs into scaffolds, resulting in a genome assembly with 26 chromosomes, and a scaffold N50 length of 25.8 Mb. Using 24,552 protein-coding genes annotated in the yellow catfish genome, the phylogenetic relationships of the yellow catfish with other teleosts showed that yellow catfish separated from the common ancestor of channel catfish ~81.9 million years ago. 1,717 gene families were identified to be expanded in the yellow catfish and those gene families are mainly enriched in immune system, signal transduction, glycosphingolipid biosynthesis and fatty acid biosynthesis.</p> <p><b>Conclusion:</b> Taking advantage of Illumina, PacBio and Hi-C technologies, we constructed the first high-quality chromosomal-level genome assembly for the yellow catfish <i>P. fulvidraco</i>. The genomic resources generated in this work not only offer a valuable reference genome for functional genomics studies of yellow catfish to decipher the economic traits and sex determination, but also provide important chromosome information for genome comparisons in the wider evolutionary research community.</p> |             |
| <b>Corresponding Author:</b>                         | Jie Mei<br>Huazhong Agriculture University<br>Wuhan, Hubei CHINA                                                                                                                                                                                                                                                                                                                                                                                                                                                                                                                                                                                                                                                                                                                                                                                                                                                                                                                                                                                                                                                                                                                                                                                                                                                                                                                                                                                                                                                                                                                                                                                                                                                                                                                                                                                                                                                                                                                                                                                                                                                                                                                                                                                                             |             |
| <b>Corresponding Author Secondary Information:</b>   |                                                                                                                                                                                                                                                                                                                                                                                                                                                                                                                                                                                                                                                                                                                                                                                                                                                                                                                                                                                                                                                                                                                                                                                                                                                                                                                                                                                                                                                                                                                                                                                                                                                                                                                                                                                                                                                                                                                                                                                                                                                                                                                                                                                                                                                                              |             |
| <b>Corresponding Author's Institution:</b>           | Huazhong Agriculture University                                                                                                                                                                                                                                                                                                                                                                                                                                                                                                                                                                                                                                                                                                                                                                                                                                                                                                                                                                                                                                                                                                                                                                                                                                                                                                                                                                                                                                                                                                                                                                                                                                                                                                                                                                                                                                                                                                                                                                                                                                                                                                                                                                                                                                              |             |
| <b>Corresponding Author's Secondary Institution:</b> |                                                                                                                                                                                                                                                                                                                                                                                                                                                                                                                                                                                                                                                                                                                                                                                                                                                                                                                                                                                                                                                                                                                                                                                                                                                                                                                                                                                                                                                                                                                                                                                                                                                                                                                                                                                                                                                                                                                                                                                                                                                                                                                                                                                                                                                                              |             |
| <b>First Author:</b>                                 | Gaorui Gong                                                                                                                                                                                                                                                                                                                                                                                                                                                                                                                                                                                                                                                                                                                                                                                                                                                                                                                                                                                                                                                                                                                                                                                                                                                                                                                                                                                                                                                                                                                                                                                                                                                                                                                                                                                                                                                                                                                                                                                                                                                                                                                                                                                                                                                                  |             |
| <b>First Author Secondary Information:</b>           |                                                                                                                                                                                                                                                                                                                                                                                                                                                                                                                                                                                                                                                                                                                                                                                                                                                                                                                                                                                                                                                                                                                                                                                                                                                                                                                                                                                                                                                                                                                                                                                                                                                                                                                                                                                                                                                                                                                                                                                                                                                                                                                                                                                                                                                                              |             |
| <b>Order of Authors:</b>                             | Gaorui Gong                                                                                                                                                                                                                                                                                                                                                                                                                                                                                                                                                                                                                                                                                                                                                                                                                                                                                                                                                                                                                                                                                                                                                                                                                                                                                                                                                                                                                                                                                                                                                                                                                                                                                                                                                                                                                                                                                                                                                                                                                                                                                                                                                                                                                                                                  |             |
|                                                      | Cheng Dan                                                                                                                                                                                                                                                                                                                                                                                                                                                                                                                                                                                                                                                                                                                                                                                                                                                                                                                                                                                                                                                                                                                                                                                                                                                                                                                                                                                                                                                                                                                                                                                                                                                                                                                                                                                                                                                                                                                                                                                                                                                                                                                                                                                                                                                                    |             |
|                                                      | Shijun Xiao                                                                                                                                                                                                                                                                                                                                                                                                                                                                                                                                                                                                                                                                                                                                                                                                                                                                                                                                                                                                                                                                                                                                                                                                                                                                                                                                                                                                                                                                                                                                                                                                                                                                                                                                                                                                                                                                                                                                                                                                                                                                                                                                                                                                                                                                  |             |
|                                                      |                                                                                                                                                                                                                                                                                                                                                                                                                                                                                                                                                                                                                                                                                                                                                                                                                                                                                                                                                                                                                                                                                                                                                                                                                                                                                                                                                                                                                                                                                                                                                                                                                                                                                                                                                                                                                                                                                                                                                                                                                                                                                                                                                                                                                                                                              |             |

|                                                |                                                                                                                                                                                                                                                                                                                                                                                                                                                                                                                                                                                                                                                                                                                                                                                                                                                                                                                                                                                                                                                                                                                                                                                                                                                                                                                                                                                                                                                                                                                                                                                                                                                                                                                                                                                                                                                                                                                                                                                                                                                                                                                                                                                                                                                                                                                                                                                                                                                                                                                                                                                                                                                                                                                                                                                                                     |
|------------------------------------------------|---------------------------------------------------------------------------------------------------------------------------------------------------------------------------------------------------------------------------------------------------------------------------------------------------------------------------------------------------------------------------------------------------------------------------------------------------------------------------------------------------------------------------------------------------------------------------------------------------------------------------------------------------------------------------------------------------------------------------------------------------------------------------------------------------------------------------------------------------------------------------------------------------------------------------------------------------------------------------------------------------------------------------------------------------------------------------------------------------------------------------------------------------------------------------------------------------------------------------------------------------------------------------------------------------------------------------------------------------------------------------------------------------------------------------------------------------------------------------------------------------------------------------------------------------------------------------------------------------------------------------------------------------------------------------------------------------------------------------------------------------------------------------------------------------------------------------------------------------------------------------------------------------------------------------------------------------------------------------------------------------------------------------------------------------------------------------------------------------------------------------------------------------------------------------------------------------------------------------------------------------------------------------------------------------------------------------------------------------------------------------------------------------------------------------------------------------------------------------------------------------------------------------------------------------------------------------------------------------------------------------------------------------------------------------------------------------------------------------------------------------------------------------------------------------------------------|
|                                                | Wenjie Guo                                                                                                                                                                                                                                                                                                                                                                                                                                                                                                                                                                                                                                                                                                                                                                                                                                                                                                                                                                                                                                                                                                                                                                                                                                                                                                                                                                                                                                                                                                                                                                                                                                                                                                                                                                                                                                                                                                                                                                                                                                                                                                                                                                                                                                                                                                                                                                                                                                                                                                                                                                                                                                                                                                                                                                                                          |
|                                                | Peipei Huang                                                                                                                                                                                                                                                                                                                                                                                                                                                                                                                                                                                                                                                                                                                                                                                                                                                                                                                                                                                                                                                                                                                                                                                                                                                                                                                                                                                                                                                                                                                                                                                                                                                                                                                                                                                                                                                                                                                                                                                                                                                                                                                                                                                                                                                                                                                                                                                                                                                                                                                                                                                                                                                                                                                                                                                                        |
|                                                | Yang Xiong                                                                                                                                                                                                                                                                                                                                                                                                                                                                                                                                                                                                                                                                                                                                                                                                                                                                                                                                                                                                                                                                                                                                                                                                                                                                                                                                                                                                                                                                                                                                                                                                                                                                                                                                                                                                                                                                                                                                                                                                                                                                                                                                                                                                                                                                                                                                                                                                                                                                                                                                                                                                                                                                                                                                                                                                          |
|                                                | Junjie Wu                                                                                                                                                                                                                                                                                                                                                                                                                                                                                                                                                                                                                                                                                                                                                                                                                                                                                                                                                                                                                                                                                                                                                                                                                                                                                                                                                                                                                                                                                                                                                                                                                                                                                                                                                                                                                                                                                                                                                                                                                                                                                                                                                                                                                                                                                                                                                                                                                                                                                                                                                                                                                                                                                                                                                                                                           |
|                                                | Yan He                                                                                                                                                                                                                                                                                                                                                                                                                                                                                                                                                                                                                                                                                                                                                                                                                                                                                                                                                                                                                                                                                                                                                                                                                                                                                                                                                                                                                                                                                                                                                                                                                                                                                                                                                                                                                                                                                                                                                                                                                                                                                                                                                                                                                                                                                                                                                                                                                                                                                                                                                                                                                                                                                                                                                                                                              |
|                                                | Jicheng Zhang                                                                                                                                                                                                                                                                                                                                                                                                                                                                                                                                                                                                                                                                                                                                                                                                                                                                                                                                                                                                                                                                                                                                                                                                                                                                                                                                                                                                                                                                                                                                                                                                                                                                                                                                                                                                                                                                                                                                                                                                                                                                                                                                                                                                                                                                                                                                                                                                                                                                                                                                                                                                                                                                                                                                                                                                       |
|                                                | Xiaohui Li                                                                                                                                                                                                                                                                                                                                                                                                                                                                                                                                                                                                                                                                                                                                                                                                                                                                                                                                                                                                                                                                                                                                                                                                                                                                                                                                                                                                                                                                                                                                                                                                                                                                                                                                                                                                                                                                                                                                                                                                                                                                                                                                                                                                                                                                                                                                                                                                                                                                                                                                                                                                                                                                                                                                                                                                          |
|                                                | Nansheng Chen                                                                                                                                                                                                                                                                                                                                                                                                                                                                                                                                                                                                                                                                                                                                                                                                                                                                                                                                                                                                                                                                                                                                                                                                                                                                                                                                                                                                                                                                                                                                                                                                                                                                                                                                                                                                                                                                                                                                                                                                                                                                                                                                                                                                                                                                                                                                                                                                                                                                                                                                                                                                                                                                                                                                                                                                       |
|                                                | Jian-Fang Gui                                                                                                                                                                                                                                                                                                                                                                                                                                                                                                                                                                                                                                                                                                                                                                                                                                                                                                                                                                                                                                                                                                                                                                                                                                                                                                                                                                                                                                                                                                                                                                                                                                                                                                                                                                                                                                                                                                                                                                                                                                                                                                                                                                                                                                                                                                                                                                                                                                                                                                                                                                                                                                                                                                                                                                                                       |
|                                                | Jie Mei                                                                                                                                                                                                                                                                                                                                                                                                                                                                                                                                                                                                                                                                                                                                                                                                                                                                                                                                                                                                                                                                                                                                                                                                                                                                                                                                                                                                                                                                                                                                                                                                                                                                                                                                                                                                                                                                                                                                                                                                                                                                                                                                                                                                                                                                                                                                                                                                                                                                                                                                                                                                                                                                                                                                                                                                             |
| <b>Order of Authors Secondary Information:</b> |                                                                                                                                                                                                                                                                                                                                                                                                                                                                                                                                                                                                                                                                                                                                                                                                                                                                                                                                                                                                                                                                                                                                                                                                                                                                                                                                                                                                                                                                                                                                                                                                                                                                                                                                                                                                                                                                                                                                                                                                                                                                                                                                                                                                                                                                                                                                                                                                                                                                                                                                                                                                                                                                                                                                                                                                                     |
| <b>Response to Reviewers:</b>                  | <p>Dear Editors:</p> <p>We are submitting the revised manuscript entitled "Chromosomal-level assembly of yellow catfish genome using third-generation DNA sequencing and Hi-C analysis". You can find our detailed answers to points raised by reviewers in our response letter. We have revised our manuscript according to the comments from the reviewers.</p> <p>You and other reviewers are high appreciated for your constructive suggestions. We believe the quality and scientific significance of the manuscript has improved greatly due to the feedback of the reviewers. We hope that the paper is now in a form suitable for publication in Giga Science as a Data Note.</p> <p>Yours sincerely,</p> <p>Prof. Dr. Jie Mei<br/> College of Fisheries<br/> Huazhong Agricultural University, Wuhan, China<br/> Email: jmei@mail.hzau.edu.cn<br/> Aug 22, 2018</p> <p>Reviewer reports:</p> <p>Reviewer #1: This manuscript describes the sequencing, assembly, and analysis of the genome of yellow catfish (<i>Pelteobagrus fulvidraco</i>). The authors utilized long fragment sequencing and Hi-C scaffolding to produce chromosome-level scaffolds, then short sequences to help validate long sequences and correct consensus errors. They provided analyses to estimate gene content. This genome will be useful for basic biological studies of the yellow catfish and also for use in agriculture. The comments below are intended to better clarify the information provided.</p> <p>Estimated genome size was calculated using kmer-based calculation. This can be performed on unfiltered Illumina data, and kmers with low frequency are removed from the calculation. In their figure, this occurs at a frequency of about 15 - anything below that frequency is untrusted and is likely sequencing artifact. The authors should also make this calculation using other kmer lengths (at least 21-mers and 25-mers) to ensure this is a robust estimate.</p> <p>Reply: Thanks a lot for the suggestion. We have used the method mentioned by the reviewer and re-analyzed the Illumina data with Kmer of 17, 21, 25 and 27. The estimated genome size ranged from 706 to 714 Mb. We have added the results into the revised manuscript in line 135 and Supplementary Table 1.</p> <p>The assembly was polished using arrow and pilon (misspelled in line 7). The latest recommendation from the National Human Genome Research Institute is to use pilon to correct only indels because the short Illumina reads can be misaligned within repetitive regions and incorrectly polish the sequence.</p> <p>Reply : We thanks a lot for the reviewer's reminding. The typo of pilon was correct in the line 156. We have tested the effects of the pilon on the base error correction. The</p> |

results confirmed that pilon could significantly reduce both substitution and InDel errors (data will be published in our following paper). Therefore, we applied pilon to correct both snp and InDel for the assembled genome in this work.

Was blood from the genome reference fish used for Hi-C analysis, or was this blood from a different animal?

Reply: We used the same individual for genome reference sequencing and Hi-C experiment. We have added the description in line 164 of the revised manuscript.

There is no information on the average contig length or range of lengths, or the number and distribution of gaps within each chromosomal scaffold. Although the contig N50 is 1.1 Mb, there are still 2,440 contigs in the assembly, which suggests there are many small contigs.

Reply: The reviewer's concern is very important. We have added a length distribution figure (Supplementary Figure 2) in the revised manuscript, showing the range of contig length. We also added a figure (Supplementary Figure 3) to show the length distribution of anchored and unanchored contigs, showing that the length of the unanchored contigs were obviously smaller than the anchored contigs. We therefore speculated that short lengths of unanchored contigs limited effective Hi-C reads mapping, leading to insufficient supporting evidence for their clustering, ordering and orientation on chromosomes. The gap distribution along chromosome was also shown in the Supplementary Figure 4. We found that gaps were enriched on two ends of chromosomes. Gap distribution of on chromosomes could be explained the distribution of repeat at chromosome terminals.

What is the final statistic on contig numbers, length, scaffolds, etc. for the submission?

Reply: We have added the Supplementary Table 2 in the revised manuscript according to the reviewer's suggestion.

How many contigs are there per chromosome? A simple table would suffice.

Reply: The supplementary table 2 were added in the revised manuscript to show the detailed contig information for chromosomes.

What was the average length of the 1,224 contigs that were removed during chromosomal scaffolding?

Reply : Using Hi-C data, we anchored 2,440 of 3,652 contigs into chromosomes. Those contigs (sequence number 1,212) were not removed, but was left in the final assembly as unanchored sequences. The average length of those 1,212 was 35.0 kb, which was significantly lower than that of the whole genome contigs (Supplementary Figure 3).

In Figure 4, the authors place seahorse phylogeny somewhere within teleost phylogeny. They should carefully examine their tree and compare it to previously published phylogenetic trees, with justifications when their results differ from the vast array of available phylogenies.

Reply : The reviewer's concern is very important. We have examined the phylogenetic results with the seahorse genome literature<sup>1</sup>, and found our result was consistent with the study. We thank the reviewer for the important reminding. We have added the reference in our revised manuscript in line 281.

There are no Figure Legends, and the information on the figures is insufficient. Figures should stand alone. For example, in Fig 2, what does the scale of 2-12 represent on the right? In Fig 3, which genomes are included in the black dots? In Supp Fig2, what do the colors represent?

Reply : We thank the reviewer for the reminding. We have added the detailed legends for figures. The color bar in Figure 2 illuminated the logarithm of the contact density from red (high) to white (low) in the plot. The statistics of 44 teleost genomes (43 public and the *P. fulvidraco* genome) were included in the Fig 3. We have added Supplementary Table 3 to include the statistics of genomes in Figure 3. In Supp Fig 2, the color represented the value of density. We have added the detailed legends for figures and tables in the revised manuscript.

Supplementary Figure 3 provides useful information and demonstrates the quality of the assembly. If Figures are limited, the authors may consider exchanging this with

Figure 3.

Reply : We thank the reviewer's constructive suggestion. We have added the Supplementary Figure 3 as Figure 4 in the revised manuscript.

Pdf page 8, Line 32 -The accuracy of 99.997%, as calculated by 21,143/780,000,000 bp, assumes complete homozygosity of the genome reference donor. Was this a homozygous fish? Otherwise, these SNPs could represent heterozygous loci within this fish or could represent assembly consensus artifact. This is also confounded with potential misalignment of Illumina reads in repetitive regions. Thus, an 'accuracy' estimate is complicated and hard to estimate.

Reply : The reviewer is correct that the "accuracy" of the genome assembly was complicated and hard to estimated. To avoid the mis-understanding, we have deleted the sentence of the genome accuracy from our manuscript.

Minor corrections:

Will the RRID citations be replaced with URLs?

Reply : We used the RRID for software used in this work because the GigaScience journal recommends the RRID. We have added a list of software and URLs at the end of the revised manuscript.

Pdf page 7, Line 16 - SDS molecules were quenched. Is "quenched" the correct term?

Reply: Thank for the reviewer's reminding. In this experimental step, Triton X-100 was used to quench the SDS to prevent it from denaturing enzymes in subsequent steps. We used the similar experimental steps and description as the following the reference2.

Pdf page 7, Line 39 - Please provide a reference for the 'previous study'.

Reply: Thanks for the reminding. We have added the citation in the revised manuscript (line 183).

Pdf page 8, Line 3 - do you mean 'contig number' instead of 'sequence number'?

Reply: We have corrected the sequencing number to contig number as reviewer's suggestion (line 204).

Pdf page 8, Line 23 - Which BUSCO database was used for this comparison?

Reply: The actinopterygii\_odb9 database in BUSCO was used in our analysis. We have added the information in our revised manuscript in line 225.

Pdf page9, lines 13 and 31 - 'with a maximal e-value'

Reply : We have corrected the manuscript according to the reviewer's suggestion in line 258 and 268.

Reviewer #2: This manuscript describes the assembly of the yellow catfish genome, using state-of-the-art methodology. I have a few questions/comments on the text, methodology and results, that I would ask the authors to address:

Page 2, line 12: ' genome character evaluation', I assume this refers to nucleotide identity (using Illumina sequence) as contrasted with structural assembly (using PacBio data)? Also, what were the lengths of the Illumina reads?

Reply : Sorry for the confound to the reviewer. Here "genome character evaluation" means using NGS data to evaluated the genome size, the level of heterozygosity and repeat content in the genome. We have added the description to clarify in line 114-115. The length of Illumina reads was 150 bp.

Page 3, line 2: I am not familiar with the Genome Puzzle Master method. Perhaps you could describe the methodology in some detail. For example, what are its assumptions when merging assemblies? Do these fit two long-read assemblies as input data? How does the method end up with a much larger (730 Mbp) assembly than either of the inputs (both around 690 Mbp)?

Reply : Genome puzzle master (GPM) is a tool to build and edit pseudomolecules from fragmented sequences using sequence relationships.<sup>3</sup> Since overlap information among contigs from two genomes can be used to guide the genome assembly, one important application of the GPM is to improve the genome assembly through

sequence-to-sequence alignments. Based on complements of two genomes, the contig could be elongated and the gaps are filled by sequences bridging two contigs. The method was used to improved the rice genome assemblies based on PacBio sequencing.<sup>4</sup> We have added the more information and the reference for the application of GMP in line 146-151 of the revised manuscript.

Page 3, line 5: plion -> Pilon

Reply: Thanks for the reviewer for the reminding. We have correct the typo in line 156 of the revised manuscript.

Page 3, HiC description: This section is much more detailed than the others, perhaps streamline this a bit. In the methods, I actually miss the crosslinking step?

Reply : Thanks a lot for the reviewer. We have added the detailed steps for the crosslinking step for our Hi-C experiments in line 166-170 of the revised manuscript.

Page 3, lines 40/55: please cite the ' previous study'/'previous reports'

Reply : We have added the citation for the previous study to support the sentence in line 183.

Page 4, line 33: 'homologous SNP' -> homozygous SNP?

Reply: Thanks a lot for the reviewer. We have corrected the typo in the line 235 of the revised manuscript.

Figure 2: Please add a scale for the heatmap. Also, the assembly size used appears to be a 690 Mbp one instead of the final 730 Mbp assembly?

Reply : Thanks for the reviewer's reminding. We only illuminate the contact heatmap for sequences anchored in chromosomes, with a total length of 690 Mb. We have added the information in the legend of the figure.

Figure 3: I a quite sure there are more than five teleost assemblies with contig N50s over 100 kbp. The scaffold N50 scale is, for the interesting assemblies, less of a measure of assembly quality than an illustration of chromosome length.

Reply : We have included a supplementary table 3 for the fish species that we used in Figure 3. However, not every fish were assembled into chromosome level. Therefore, we only showed scaffold N50 in the Y axis.

General comment: as a major biological interest for the use of this genome assembly is the study of sex determination, and you used a female (XY) specimen, I assume you could already identify the two sex chromosomes in the assembly (using either coverage or heterozygosity)?

Reply: We used XX female for genome assembly. The reviewer is correct. We have developed sex-specific markers in our previous studies<sup>5</sup> and could help us to identified putative sex chromosome. The application of the genome on the sex-determination studies of the yellow catfish will be illuminated in our following reports.

Reviewer #3: In this manuscript Gong and colleagues reports the genome assembly of the yellow catfish (*Pelteobagrus fulvidraco*), an economically important freshwater fish manly farmed in China. This fish species exhibits a remarkable sex dimorphism on growth rate. Considering its economic relevance, the draft genome of the yellow catfish will be a valuable resource to facilitate future research aimed at improving relevant traits, and more generally at addressing ecological and evolutionary questions.

The authors used an adequate amount of sequence data coming from three different technologies (short reads, long reads and Hi-C), and this allowed to generate a robust chromosome-level genome. The workflow to assemble the genome sounds good and it is generally well described, even though some steps need to be better explained. Further, the authors annotated the genome using a combination of ab initio and homology-based methods that allowed them to identify a number of genes that is comparable to what has usually been found in other teleost fishes. Finally, they carried out some comparative genomics analyses including a bunch of other fish species in order to place the yellow catfish in well-defined phylogenetic context and to analyse the expansion/contraction of gene families in this lineage.

That said, I think that this manuscript needs some revision before to be considered for

publication in GigaScience. My main concern is about the language as the manuscript suffers from lack of clarity in several sections. Many sentences would benefit from being re-written and in general all the manuscript should be proofread before to be resubmitted to this or to any other journal.

Minor points:

Abstract, Finding:

- Change "The sequencing results were assembled..." to "The sequencing data were assembled..."

Reply: Thanks a lot for the reviewer's correction. We have revised the manuscript in line 39.

Introduction:

- The introduction is quite short. I would suggest the authors to expand the first section focusing on the species description, what are its distinctive traits, what type of studies have been done so far and to address which questions etc.

Reply: Thank a lot for the reviewer's constructive suggestion. We have expanded our introduction section for the description and recent research progresses of the yellow catfish in line 67-86 of the revised manuscript.

- As it appears here for the first time, please introduce "Hi-C" with its full name "Chromosome conformation capture"

Reply: Thanks for the reviewer's suggestion. We have added the introduction of Hi-C in the revised manuscript in line 160-165.

Sample and sequencing:

- "...platform according to the according..."

- PacBio flow cell should be "PacBio SMRT Cell"

Reply : We have revised the sentences in line 138 of the revised manuscript.

Genome quality evaluation:

- Which version of BUSCO did you use? And which database? The CVG (Core Vertebrate Genes) or the whole vertebrate gene set? Please include the number of genes that matched the database used, not only the percentage.

Reply : BUSCO v3.0 and actinopterygii\_odb9 database was used for the genome evaluation. We have added the BUSCO version, database type and detailed output of the analysis in our revised manuscript (line 224-225).

- "Using the Illumina short...". Can the authors explain what they exactly did here?

Reply : The Illumina short reads were aligned to the reference genome, and the SNP loci were called through GATK pipeline. We have added the detailed method in the revised manuscript (line 233-234).

Conclusion:

- Here at the beginning of the paragraph, I would mention that you also used Illumina short reads.

Reply : Thanks for the reminding. We have added the Illumina short read in the revised manuscript in line 304.

Software version is missing several times along the text, and different styles are used to cite a software. Please revise and make it consistent.

Reply : We have added the software version information and revised the citation for the software.

Table 1:

- I would slightly change the first 2 columns of table 1:

Library type: "short reads", "long reads", "Hi-C"

Reply : We have revised the table information according to the reviewer's suggestion in Table 1.

Figure 1 is quite ugly. I suggest the authors to look for a better image or take a picture themselves.

Reply: We have replaced the Figure 1 in our revised manuscript. Thank the reviewer for the suggestion.



|                                                                                                                                                                                                                                                                                                                                                                                                                                    |                                                                                                                                                                                                                                                                                                                                                                                                                                                                                                                                                                                                                                                                                                                                                                                                                                                                                                                                                                                                                                                                                                                                                                                                                                                                                                                             |
|------------------------------------------------------------------------------------------------------------------------------------------------------------------------------------------------------------------------------------------------------------------------------------------------------------------------------------------------------------------------------------------------------------------------------------|-----------------------------------------------------------------------------------------------------------------------------------------------------------------------------------------------------------------------------------------------------------------------------------------------------------------------------------------------------------------------------------------------------------------------------------------------------------------------------------------------------------------------------------------------------------------------------------------------------------------------------------------------------------------------------------------------------------------------------------------------------------------------------------------------------------------------------------------------------------------------------------------------------------------------------------------------------------------------------------------------------------------------------------------------------------------------------------------------------------------------------------------------------------------------------------------------------------------------------------------------------------------------------------------------------------------------------|
|                                                                                                                                                                                                                                                                                                                                                                                                                                    | <p>Figure 3: The legend is not so informative. What are the black and the red dots? I know they indicate different fish species, but what are the criteria to make them red or black? Please add this info in the legend.</p> <p>Reply: The red dots in Figure 3 represented the teleost genomes that totally assembled using long reads from the third-generation sequencing platform. We have added the detailed the legends for all figures and tables in the revised manuscript.</p> <p>References</p> <p>1Qiang, L. et al. The seahorse genome and the evolution of its specialized morphology. <i>Nature</i> 540, 395-399 (2016).</p> <p>2Belton, J. M. et al. Hi-C: a comprehensive technique to capture the conformation of genomes. <i>Methods</i> 58, 268-276 (2012).</p> <p>3Zhang, J. et al. in <i>International Plant and Animal Genome Conference Xx</i>.</p> <p>4Zhang, J. et al. Extensive sequence divergence between the reference genomes of two elite indica rice varieties Zhenshan 97 and Minghui 63. <i>Proc Natl Acad Sci U S A</i> 113, E5163 (2016).</p> <p>5Wang, D., Mao, H. L., Chen, H. X., Liu, H. Q. &amp; Gui, J. F. Isolation of Y- and X-linked SCAR markers in yellow catfish and application in the production of all-male populations. <i>Animal Genetics</i> 40, 978-981 (2010).</p> |
| <b>Additional Information:</b>                                                                                                                                                                                                                                                                                                                                                                                                     |                                                                                                                                                                                                                                                                                                                                                                                                                                                                                                                                                                                                                                                                                                                                                                                                                                                                                                                                                                                                                                                                                                                                                                                                                                                                                                                             |
| <b>Question</b>                                                                                                                                                                                                                                                                                                                                                                                                                    | <b>Response</b>                                                                                                                                                                                                                                                                                                                                                                                                                                                                                                                                                                                                                                                                                                                                                                                                                                                                                                                                                                                                                                                                                                                                                                                                                                                                                                             |
| Are you submitting this manuscript to a special series or article collection?                                                                                                                                                                                                                                                                                                                                                      | No                                                                                                                                                                                                                                                                                                                                                                                                                                                                                                                                                                                                                                                                                                                                                                                                                                                                                                                                                                                                                                                                                                                                                                                                                                                                                                                          |
| <p><b>Experimental design and statistics</b></p> <p>Full details of the experimental design and statistical methods used should be given in the Methods section, as detailed in our <a href="#">Minimum Standards Reporting Checklist</a>. Information essential to interpreting the data presented should be made available in the figure legends.</p> <p>Have you included all the information requested in your manuscript?</p> | Yes                                                                                                                                                                                                                                                                                                                                                                                                                                                                                                                                                                                                                                                                                                                                                                                                                                                                                                                                                                                                                                                                                                                                                                                                                                                                                                                         |
| <p><b>Resources</b></p> <p>A description of all resources used, including antibodies, cell lines, animals and software tools, with enough information to allow them to be uniquely identified, should be included in the Methods section. Authors are strongly encouraged to cite <a href="#">Research Resource Identifiers</a> (RRIDs) for antibodies, model organisms and tools, where possible.</p>                             | Yes                                                                                                                                                                                                                                                                                                                                                                                                                                                                                                                                                                                                                                                                                                                                                                                                                                                                                                                                                                                                                                                                                                                                                                                                                                                                                                                         |

|                                                                                                                                                                                                                                                                                                                                                                                                                                                                                                                                                         |            |
|---------------------------------------------------------------------------------------------------------------------------------------------------------------------------------------------------------------------------------------------------------------------------------------------------------------------------------------------------------------------------------------------------------------------------------------------------------------------------------------------------------------------------------------------------------|------------|
| <p>Have you included the information requested as detailed in our <a href="#">Minimum Standards Reporting Checklist</a>?</p>                                                                                                                                                                                                                                                                                                                                                                                                                            |            |
| <p><b>Availability of data and materials</b></p> <p>All datasets and code on which the conclusions of the paper rely must be either included in your submission or deposited in <a href="#">publicly available repositories</a> (where available and ethically appropriate), referencing such data using a unique identifier in the references and in the “Availability of Data and Materials” section of your manuscript.</p> <p>Have you have met the above requirement as detailed in our <a href="#">Minimum Standards Reporting Checklist</a>?</p> | <p>Yes</p> |



[Click here to view linked References](#)

1 Chromosomal-level assembly of yellow catfish genome  
2 using third-generation DNA sequencing and Hi-C analysis

3  
4 Gaorui Gong<sup>1,#</sup>, Cheng Dan<sup>1,#</sup>, Shijun Xiao<sup>2,#</sup>, Wenjie Guo<sup>1</sup>, Peipei Huang<sup>3</sup>,  
5 Yang Xiong<sup>1</sup>, Junjie Wu<sup>1</sup>, Yan He<sup>1</sup>, Jicheng Zhang<sup>2</sup>, Xiaohui Li<sup>1</sup>, Nansheng  
6 Chen<sup>4,5</sup>, Jian-Fang Gui<sup>1,3,\*</sup>, Jie Mei<sup>1,\*</sup>

7  
8 <sup>1</sup> College of Fisheries, Key Laboratory of Freshwater Animal Breeding,  
9 Ministry of Agriculture, Huazhong Agricultural University, Wuhan, China.

10 <sup>2</sup> Wuhan Frasergen Bioinformatics, East Lake High-Tech Zone, Wuhan,  
11 China.

12 <sup>3</sup> State Key Laboratory of Freshwater Ecology and Biotechnology, Institute  
13 of Hydrobiology, Chinese Academy of Sciences, University of the Chinese  
14 Academy of Sciences, Wuhan, China.

15 <sup>4</sup> Institute of Oceanology, Chinese Academy of Sciences, Qingdao, Shandong,  
16 China

17 <sup>5</sup> Department of Molecular Biology and Biochemistry, Simon Fraser University,  
18 Burnaby, Canada

19  
20 # These authors contributed equally to this work.

21 \* Corresponding author. Tel: +86-27-87282113; Fax: +86-27-87282114.

22 *Email address:* jmei@mail.hzau.edu.cn (Dr. Jie Mei, ORCID:  
23 0000-0001-5308-3864)

24 jfgui@ihb.ac.cn (Dr. Jian-Fang Gui)

25

26

27

28

1  
2  
3  
4  
5  
6  
7  
8  
9  
10  
11  
12  
13  
14  
15  
16  
17  
18  
19  
20  
21  
22  
23  
24  
25  
26  
27  
28  
29  
30  
31  
32  
33  
34  
35  
36  
37  
38  
39  
40  
41  
42  
43  
44  
45  
46  
47  
48  
49  
50  
51  
52  
53  
54  
55  
56  
57  
58  
59  
60  
61  
62  
63  
64  
65

## 29 Abstract

1  
2  
3 30 **Background:** The yellow catfish, *Pelteobagrus fulvidraco*, belonging to Siluriformes order,  
4 31 is an economically important freshwater aquaculture fish species in Asia, especially in  
5 32 Southern China. The aquaculture industry has recently been facing tremendous  
6 33 challenges in germplasm degeneration and poor diseases resistance. As the yellow  
7 34 catfish exhibits notable sex dimorphism in growth, with adult males about two to three fold  
8 35 bigger than females, how aquaculture industry takes advantage of such sex dimorphism is  
9 36 another challenge. To address these issues, a high-quality reference genome of the  
10 37 yellow catfish would be a very useful resource.

11  
12  
13  
14  
15  
16 38 **Finding:** To construct a high-quality reference genome for the yellow catfish, we  
17 39 generated 51.2 Gb short reads and 38.9 Gb long reads using Illumina and PacBio  
18 40 sequencing platforms, respectively. The sequencing data were assembled into a 732.8  
19 41 Mb genome assembly with a contig N50 length of 1.1 Mb. Additionally, we applied Hi-C  
20 42 technology to identify contacts among contigs, which were then used to assemble contigs  
21 43 into scaffolds, resulting in a genome assembly with 26 chromosomes, and a scaffold N50  
22 44 length of 25.8 Mb. Using 24,552 protein-coding genes annotated in the yellow catfish  
23 45 genome, the phylogenetic relationships of the yellow catfish with other teleosts showed  
24 46 that yellow catfish separated from the common ancestor of channel catfish ~81.9 million  
25 47 years ago. 1,717 gene families were identified to be expanded in the yellow catfish and  
26 48 those gene families are mainly enriched in immune system, signal transduction,  
27 49 glycosphingolipid biosynthesis and fatty acid biosynthesis.

28  
29  
30  
31  
32  
33  
34  
35  
36 50 **Conclusion:** Taking advantage of Illumina, PacBio and Hi-C technologies, we  
37 51 constructed the first high-quality chromosomal-level genome assembly for the yellow  
38 52 catfish *P. fulvidraco*. The genomic resources generated in this work not only offer a  
39 53 valuable reference genome for functional genomics studies of yellow catfish to decipher  
40 54 the economic traits and sex determination, but also provide important chromosome  
41 55 information for genome comparisons in the wider evolutionary research community.

42  
43  
44  
45  
46  
47  
48  
49 58 **Key Words:** yellow catfish, PacBio, Hi-C, genomics, chromosomal assembly  
50 59  
51 60  
52 61  
53 62  
54 63  
55 64  
56 65

## 66 Data description

### 67 Introduction

68 The yellow catfish, *Pelteobagrus fulvidraco*, (Richardson, 1846; NCBI Taxonomy  
69 ID: 1234273; Fishbase ID: 28052) is a teleost fish belonging to the order Siluriformes  
70 (**Figure 1**), and is an economically important freshwater fish species in Asia.<sup>1</sup> In recent  
71 years, yellow catfish has become one of the most important aquaculture species in China  
72 with an increasing market value because of its high meat quality and lack of intermuscular  
73 bones besides the spine<sup>2</sup>. However, due to the ultra-intensive aquaculture and loss of  
74 genetic diversity, artificial breeding of yellow catfish is facing tremendous challenges such  
75 as germplasm degeneration and poor diseases resistance<sup>3</sup>. Meanwhile, as an XY  
76 sex-determining type fish species, yellow catfish is also an excellent model for studying  
77 sex determination and sexual size dimorphism in fish<sup>4,5</sup>. As female and male yellow  
78 catfish exhibit remarkable sex dimorphism in their growth rate, with adult yellow catfish  
79 males about two to three fold bigger than the females. In the last decade, sex-specific  
80 allele markers were developed and YY super-male fish were generated from gynogenesis  
81 of XY physiological female fish. Finally, XX male, XY female, YY super-male and females  
82 have been created and provide a unique model to study sex determination in fish  
83 species<sup>1,6,7</sup>. Recently, transgene and gene knockout technologies have been successively  
84 applied in yellow catfish to reveal the function of *pfpdz1* gene, a novel PDZ  
85 domain-containing gene, in whose intron the sex-linked marker was located. The *pfpdz1*  
86 gene plays an important role in male sex differentiation and maintenance in yellow catfish<sup>8</sup>.  
87 Taken together these features provide a platform for gene-editing methods to study gene  
88 function.

89 In spite of the importance of yellow catfish both in sex-determination research and in  
90 aquaculture, the genomic resources for the species are still limited. So far, only  
91 transcriptome, SSR and SNP data have been reported for yellow catfish<sup>5</sup>, the genome  
92 sequence for this important species is still missing, hindering the genome-based  
93 functional gene identification controlling important economic traits and the application of  
94 genome-assisted breeding in yellow catfish. In this work, we combined genomic  
95 sequencing data from Illumina short reads and PacBio long reads to generate the first  
96 reference genome for yellow catfish, and applied Hi-C data to scaffold the genome  
97 sequences into the chromosomal level. The completeness and continuity of the genome  
98 were comparable with other model teleost species. We believe that the high-quality  
99 reference genome generated in this work will definitely facilitate research on population  
100 genetics and functional genes identification related to important economic traits and the  
101 sex determinant for yellow catfish, which will in turn accelerate the development of more  
102 efficient sex control techniques and improve the artificial breeding industry for this

103 economically important fish species.

## 104 **Sample and sequencing**

105 A XX genotype female yellow catfish (Figure 1), reared in the breeding center of  
106 Huazhong Agricultural University in Wuhan City, Hubei Province, was used for preparing  
107 DNA for sequencing. To obtain sufficient high-quality DNA molecules for the PacBio  
108 Sequel platform (Pacific Biosciences of California, Menlo Park, CA, USA), one yellow  
109 catfish was dissected and fresh muscle tissues were used for DNA extraction using the  
110 phenol/chloroform extraction method as in previous study<sup>9</sup>. The quality of the DNA was  
111 checked by agarose gel electrophoresis, and an excellent integrity of DNA molecules  
112 were observed. Other tissues, including ocular, skin, muscle, gonadal, intestinal, liver,  
113 kidney, blood, gall and air bladder tissues were snap frozen in liquid nitrogen for at least  
114 one hour and then stored at  $-80^{\circ}\text{C}$ .

115 The extracted DNA molecules were sequenced with both Illumina HiSeq X Ten  
116 platform (Illumina Inc., San Diego, CA, USA) and PacBio Sequel platforms. Short reads  
117 generated from the Illumina platform were used for the estimation of the genome size, the  
118 level of heterozygosity and repeat content of the genome, and long reads from the PacBio  
119 platform were used for genome assembly. To this end, one library with an insertion length  
120 of 250 bp was generated for the HiSeq X Ten platform and three 20 kb libraries were  
121 constructed for the PacBio platform according to the manufacturer's protocols, resulting  
122 the generation of  $\sim 51.2$  Gb short reads and  $\sim 38.9$  Gb long reads, respectively. (**Table 1**)  
123 The polymerase and subreads N50 length reached 21.3 kb and 16.2 kb, providing  
124 ultra-long genomic sequences for the following assembly.

## 125 **Genome features estimation from Kmer method**

126 The short-reads from Illumina platform were quality filtered by HTQC v1.92.3<sup>10</sup> using the  
127 following method. Firstly, the adaptors were removed from the sequencing reads. Second,  
128 read pairs were excluded if any one end has an average quality lower than 20. Third, ends  
129 of reads were trimmed if the average quality lower than 20 in the sliding window size of 5  
130 bp. Finally, read pairs with any end was shorter than 75 bp were removed.

131 The quality filtered reads were used for genome size estimation. Using the *Kmer*  
132 method described in previous method<sup>11</sup>, we calculated and plot the 17-mer depth  
133 distribution in SI Figure 1. The formula  $G = N_{17\text{-mer}} / D_{17\text{-mer}}$ , where the  $N_{17\text{-mer}}$  is the total  
134 number of 17-mers, and  $D_{17\text{-mer}}$  denotes the peak frequency of 17-mers, were used to  
135 estimate the genome size of yellow catfish. As a result, we estimated a genome size of  
136 714 Mb, as well as a heterozygosity rate of 0.45% and repeat ratio of 43.31%. To confirm  
137 the robustness of the genome size estimation, we performed additional analysis with

138 Kmer of 21, 25 and 27, and found the estimated genome size ranged from 706 to 718 Mb  
139 (**Supplementary Table 1**).

#### 140 **Genome assembly by third-generation long reads**

141 With 6 SMRT cells in PacBio Sequel platform, we generated 38.9 Gb subreads by  
142 removing adaptor sequences within sequences. The mean and N50 length were 9.8 and  
143 16.2 kb, respectively. The long subreads were used for genomic assembly of yellow  
144 catfish. Firstly, Falcon v0.3.0 package<sup>12</sup> with a parameter of length\_cutoff as 10 kb and  
145 pr\_length\_cutoff as 8 kb was used. As a result, we obtained a 690 Mb genome with a  
146 contig N50 length of 193.1 kb. Secondly, canu v1.5<sup>13</sup> was employed separately for  
147 genome assembly with default parameters, leading to 688.6 Mb yellow catfish genome  
148 with contig N50 of 427.3 kb.

149 Although the size of genome assembly from both Falcon and canu was comparable  
150 with the estimation based on Kmer method, the continuity of the genome need further  
151 improvement. Genome puzzle master (GPM)<sup>14</sup> is a tool to guide the genome assembly  
152 from fragmented sequences using overlap information among contigs from genomes.<sup>14</sup>  
153 Based on the complementarity of the two genomes, the contig could be merged and the  
154 gaps filled by sequences bridging the two contigs.<sup>15</sup> Taking advantage of the sequence  
155 complementation of the two assemblies from Falcon and canu, we therefore applied  
156 GPM<sup>14</sup> to merge long contigs using reliable overlaps between sequences. Finally, a ~730  
157 Mb genome assembly of yellow catfish with 3,564 contigs and contig N50/L50 of 1.1  
158 Mb/126 was constructed. The final genome sequences were then polished by arrow<sup>16</sup>  
159 using PacBio long reads and by pilon release 1.12<sup>17</sup> using Illumina short reads to correct  
160 errors in base level. The length distribution for contigs in the final assembly is presented in  
161 **Supplementary Figure 2**.

#### 162 **In situ Hi-C library construction and chromosome assembly using Hi-C data**

163 Hi-C is a technique allowing to unbiased identify chromatin interactions across the  
164 entire genome<sup>18</sup>. The technique was introduced in as a genome-wide version of 3C  
165 (Capturing chromosome conformation)<sup>19</sup>, and was used as a powerful tool in the  
166 chromosome genome assembly of many projects in recent years<sup>20</sup>. In this work, Hi-C  
167 experiments and data analysis on blood sample was used for the chromosome assembly  
168 of the yellow catfish. Blood sample from the same yellow catfish for genomic DNA  
169 sequencing was used for library construction for Hi-C analysis. 0.1 ml blood were  
170 cross-linked for 10 min with 1% final concentration fresh formaldehyde and quenched with  
171 0.2 M final concentration glycine for 5 min. The cross-linked cells were subsequently lysed  
172 in lysis bufer (10 mMTris-HCl (pH 8.0), 10 mM NaCl, 0.2% NP40, and complete protease  
173 inhibitors (Roche)). The extracted nuclei were re-suspended with 150  $\mu$ l 0.1% SDS and  
174 incubated at 65°C for 10 min, then SDS molecules were quenched by adding 120  $\mu$ l water

175 and 30  $\mu$ l 10% Triton X-100, and incubated at 37 °C for 15 min. The DNA in the nuclei was  
176 digested by adding 30  $\mu$ l 10x NEB buffer 2.1(50 mM NaCl, 10 mM Tris-HCl, 10 mM MgCl<sub>2</sub>,  
177 100  $\mu$ g/ml BSA, pH 7.9) and 150U of Mbol, and incubated at 37 °C overnight. On the next  
178 day, the Mbol enzyme was inactivated at 65 °C for 20 min. Next, the cohesive ends were  
179 filled in by adding 1  $\mu$ l of 10 mM dTTP, 1  $\mu$ l of 10 mM dATP, 1  $\mu$ l of 10 mM dGTP, 2  $\mu$ l of 5  
180 mM biotin-14-dCTP, 14  $\mu$ l water and 4  $\mu$ l (40 U) Klenow, and incubated at 37 °C for 2 h.  
181 Subsequently, 663  $\mu$ l water, 120  $\mu$ l 10x blunt-end ligation buffer (300 mM Tris-HCl, 100 mM  
182 MgCl<sub>2</sub>, 100 mM DTT, 1 mM ATP, pH 7.8), 100  $\mu$ l 10% Triton X-100 and 20 U T4 DNA  
183 ligase were added to start proximity ligation. The ligation reaction was placed at 16 °C for  
184 4 h. After ligation, the cross-linking was reversed by 200  $\mu$ g/mL proteinase K (Thermo) at  
185 65°C overnight. Subsequent chromatin DNA manipulations were performed as a similar  
186 method described in the previous study<sup>19</sup>. DNA purification was achieved through QIAamp  
187 DNA Mini Kits (Qiagen) according to manufacturers` instructions. Purified DNA was  
188 sheared to a length of ~400 bp. Point ligation junctions were pulled down by Dynabeads®  
189 MyOne™ Streptavidin C1 (Thermofisher) according to manufacturers` instructions. The  
190 Hi-C library for Illumina sequencing was prepared by NEBNext® Ultra™ II DNA library  
191 Prep Kit for Illumina (NEB) according to manufacturers` instructions. The final library was  
192 sequenced on the Illumina HiSeq X Ten platform (San Diego, CA, United States) with 150  
193 PE mode.

194 487 million raw reads were generated from the Hi-C library and were mapped to the  
195 polished yellow catfish genome using Bowtie 1.2.2 (RRID:SCR\_005476)<sup>21</sup> with the  
196 default parameters. The iterative method was used to increase the interactive Hi-C reads  
197 ratio<sup>22</sup>. Two ends of paired reads were mapped to the genome independently, but only  
198 the reads that two pairs were uniquely mapped to genome were used. Self-ligation,  
199 non-ligation and other invalid reads, such as StartNearRsite, PCR amplification, random  
200 break, LargeSmallFragments and ExtremeFragments, were filtered using the method and  
201 hiclib as described in previous reports<sup>23</sup>. The contact count among each contig were  
202 calculated and normalized by the restriction sites in sequences (**Figure 2**). We then  
203 successfully clustered 2,965 contigs into 26 groups with the agglomerative hierarchical  
204 clustering method in Lachesis<sup>24</sup>, which was consistent with the previous karyotype  
205 analyses of *Pseudobagrus fulvidraco*<sup>25</sup>. Lachesis was further applied to order and orient  
206 the clustered contigs, and 2,440 contigs were reliably anchored on chromosomes,  
207 presenting 66.8% and 94.2% of the total genome by contig number and base count,  
208 respectively. Then, we applied juicebox<sup>26</sup> to correct the contig orientation and to remove  
209 suspicious fragments in contig to unanchored groups by visual inspection. Finally, we  
210 obtained the first chromosomal-level high-quality yellow catfish assembly with a contig  
211 N50 of 1.1 Mb and scaffold N50 of 25.8 Mb, providing solid genomic resource for the  
212 following population and functional analysis. (**Table 2**). We compared length distribution of

1  
2  
3  
4  
5  
6  
7  
8  
9  
10  
11  
12  
13  
14  
15  
16  
17  
18  
19  
20  
21  
22  
23  
24  
25  
26  
27  
28  
29  
30  
31  
32  
33  
34  
35  
36  
37  
38  
39  
40  
41  
42  
43  
44  
45  
46  
47  
48  
49  
50  
51  
52  
53  
54  
55  
56  
57  
58  
59  
60  
61  
62  
63  
64  
65

213 contig anchored and un-anchored on chromosomes (Supplementary Figure 3), and found  
214 that anchored contigs were significantly longer than those of unanchored contigs. We  
215 therefore speculated that short lengths of unanchored contigs limited effective Hi-C reads  
216 mapping, leading to insufficient supporting evidence for their clustering, ordering and  
217 orientation on chromosomes. The gap distribution on chromosomes are shown in  
218 Supplementary Figure 4. We found that gaps were mainly distributed at two ends of  
219 chromosomes, which could be explained by the repeat distribution at chromosome  
220 terminals. The length and the statistics of contigs and gaps of each chromosome were  
221 summarized in **Supplementary Table 2**.

## 222 **Genome quality evaluation**

223 First of all, we compared the genome assembly continuity of the yellow catfish genome to  
224 those of other teleost species. We found that both contig and scaffold N50 lengths of the  
225 yellow catfish reached considerable continuity (Figure 3), providing us a high-quality  
226 genome sequences for the following functional investigations. The assembled genome  
227 were also subjected to BUSCO v3.0<sup>27</sup> (RRID:SCR\_015008, version 3.0) with the  
228 actinopterygii\_odb9 database to evaluate the completeness of the genome. Among 4,584  
229 total BUSCO groups searched, 4,179 and 92 BUSCO core genes were completed and  
230 partially identified, respectively, leading to a total of 91.2% BUSCO genes in the yellow  
231 catfish genome. After aligning short reads from Illumina platform to the genome, the  
232 insertion length distribution for sequencing library of 250 bp exhibited a single peak  
233 around the sequencing library length design (Supplementary Figure 5). Paired-end reads  
234 data were not used during the contig assembly, thus the high alignment ratio and single  
235 peak insertion length distribution demonstrated the high-quality of contig assembly for  
236 yellow catfish. Using the Illumina short read alignment to the reference genome of the  
237 yellow catfish by BWA 0.7.16 software (RRID:SCR\_010910), we identified 21,143  
238 homozygous SNP loci by GATK (RRID:SCR\_001876) package<sup>28</sup>.

## 239 **Repeat and gene annotation**

240 We first used Tandem Repeat Finder<sup>29</sup> to identify repetitive elements in yellow catfish  
241 genome. RepeatModeler (http://www.repeatmasker.org/RepeatModeler.html,  
242 RRID:SCR\_015027) were used to detect transposable elements (TE) in the genome by a  
243 *de novo* manner. The *de novo* and known repeats library from Repbase<sup>30</sup> were then  
244 combined, and the TEs were detected by mapping sequences to the combined library in  
245 yellow catfish genome using the software RepeatMasker 4.0.7 (RRID:SCR\_012954)<sup>31</sup>.

246 For protein-coding gene annotation, *de novo*-, homology- and RNA-seq-based  
247 methods were used. Augustus (RRID:SCR\_008417)<sup>32</sup> was used to predict coding genes  
248 in *de novo* prediction. For homology-based method, protein sequences of closely related  
249 fish species, including *Astyanax mexicanus*, *Danio rerio*, *Gadus morhua*, *Ictalurus*



1  
2  
3  
4  
5  
6  
7  
8  
9  
10  
11  
12  
13  
14  
15  
16  
17  
18  
19  
20  
21  
22  
23  
24  
25  
26  
27  
28  
29  
30  
31  
32  
33  
34  
35  
36  
37  
38  
39  
40  
41  
42  
43  
44  
45  
46  
47  
48  
49  
50  
51  
52  
53  
54  
55  
56  
57  
58  
59  
60  
61  
62  
63  
64  
65

250 *punctatus*, *Oryzias latipes*, *Takifugu rubripes*, *Tetraodon nigroviridis* and *Oreochromis*  
251 *niloticus* were downloaded from Ensembl<sup>33</sup> and were aligned against to the yellow catfish  
252 genome using TBLASTN (RRID:SCR\_011822) software<sup>34</sup>. Short reads from RNA-Seq  
253 (SRR1845493) were also mapped upon the genome using TopHat v2.1.1  
254 (RRID:SCR\_013035) package<sup>35</sup>, and the gene structure were formed using Cufflinks  
255 (RRID:SCR\_014597)<sup>36</sup>. Finally, 24,552 consensus protein-coding genes were predicted in  
256 the yellow catfish genome by integrating all gene models by MAKER<sup>37</sup>. The gene number,  
257 gene length distribution, CDS length distribution, exon length distribution and intron length  
258 distribution were comparable with those in other teleost fish species (Figure 4).

259 Local BLASTX (RRID:SCR\_001653) and BLASTN (RRID:SCR\_001598) programs  
260 were used to search all predicted gene sequences to NCBI non-redundant protein (nr),  
261 non-redundant nucleotide (nt), Swissprot database with a maximal e-value of  $1e^{-5}$ <sup>38</sup>. Gene  
262 ontology (GO)<sup>39</sup> and Kyoto Encyclopedia of Genes and Genomes (KEGG)<sup>40</sup> pathway  
263 annotation were also assigned to genes using the software Blast2GO<sup>41</sup>. As a result,  
264 24,552 genes were annotated to at least one database. (Table 3)

### 265 **Gene family identification and Phylogenetic analysis of yellow catfish**

266 To cluster families from protein-coding genes, proteins from the longest transcripts of  
267 each genes from yellow catfish and other fish species, including *Ictalurus punctatus*,  
268 *Clupeaharengus*, *Danio rerio*, *Takifugu rubripes*, *Hippocampus comes*, *Cynoglossus*  
269 *semilaevis*, *Oryzias latipes*, *Gadus morhua*, *Lepisosteus oculatus*, *Dicentrarchus labrax*,  
270 and *Gasterosteus aculeatus*, were extracted and aligned to each other using BLASTP  
271 (RRID:SCR\_001010) programs<sup>38</sup> with a maximal e-value of  $1e^{-5}$ . OrthMCL<sup>42</sup> was used to  
272 cluster gene family using protein BLAST result. As a result, 19,846 gene families were  
273 constructed for fish species in this work and 3,088 families were identified as single-copy  
274 ortholog gene families.

275 To reveal phylogenetic relationships among yellow catfish and other fish species, the  
276 protein sequences of single-copy ortholog gene family were aligned with MUSCLE 3.8.31  
277 (RRID:SCR\_011812) program<sup>43</sup>, and the corresponding Coding DNA Sequences (CDS)  
278 alignments were generated and concatenated with the guidance of protein alignment.  
279 PhyML v3.3 (RRID:SCR\_014629)<sup>44</sup> were used to construct the phylogenetic tree for the  
280 super-alignment of nucleotide sequences using the JTT+G+F model. Using molecular  
281 clock data from the divergence time from the TimeTree database<sup>45</sup>, the PAML v4.8  
282 MCMCtree program<sup>46</sup> was employed to determine divergence times with the approximate  
283 likelihood calculation method. The phylogenetic relationship of other fish species was  
284 consistent with previous studies<sup>47</sup>. The phylogenetic analysis based on single-copy  
285 orthologs of yellow catfish with other teleosts studied in this work estimated that the yellow  
286 catfish speciated around 81.9 million years ago from their common ancestor of the

1  
2  
3  
4  
5  
6  
7  
8  
9  
10  
11  
12  
13  
14  
15  
16  
17  
18  
19  
20  
21  
22  
23  
24  
25  
26  
27  
28  
29  
30  
31  
32  
33  
34  
35  
36  
37  
38  
39  
40  
41  
42  
43  
44  
45  
46  
47  
48  
49  
50  
51  
52  
53  
54  
55  
56  
57  
58  
59  
60  
61  
62  
63  
64  
65

287 channel catfish (Figure 5). Given yellow catfish and channel catfish belong to family  
288 Bagridae and Ictaluridae respectively, the phylogenetic analysis showed that Bagridae  
289 and Ictaluridae were separated at a comparable time scale, however, determining the  
290 exact time estimation requires more Siluriformes genomes.

### 291 **Gene family expansion and contraction analysis**

292 According to divergence times and phylogenetic relationships, CAFE<sup>48</sup> was used to  
293 analyze gene family evolution and 1,717 gene families were significantly expanded in the  
294 yellow catfish ( $P < 0.05$ ). The functional enrichment on GO and KEGG of those expanded  
295 gene families identified 350 and 42 significantly enriched ( $q\text{-value} < 0.05$ ) GO terms  
296 (**Supplementary Table 3**) and pathways (**Supplementary Table 4**), respectively. The  
297 expanded gene families were mainly found on immune system pathways, especially on  
298 Hematopoietic cell lineage ( $q\text{-value} = 2.2e-17$ ), Intestinal immune network for IgA  
299 production ( $q\text{-value} = 2.4e-17$ ), Complement and coagulation cascades ( $q\text{-value} =$   
300  $1.4e-15$ ) and Antigen processing and presentation ( $q\text{-value} = 2.3e-9$ ) on KEGG pathways,  
301 and Signal transduction pathways, including NF-kappa B signaling pathway ( $q\text{-value} =$   
302  $5.4e-9$ ), Rap1 signaling pathway ( $q\text{-value} = 1.9e-6$ ) and PI3K-Akt signaling pathway  
303 ( $q\text{-value} = 2.3e-4$ ). Meanwhile, 208 GO terms and 44 KEGG pathways, including  
304 endocrine system, signal transduction, xenobiotics biodegradation and metabolism,  
305 sensory system were enriched using significantly contracted gene families.

### 306 **Conclusion**

307 Combining Illumina and PacBio sequencing platforms with Hi-C technology, we reported  
308 the first high-quality chromosomal level genome assembly for the yellow catfish. The  
309 contig and scaffold N50 reached 1.1 and 25.8 Mb, respectively. 24,552 protein-coding  
310 genes were identified in the assembled yellow catfish, and 3,088 gene families were  
311 clustered for fish species in this work. The phylogenetic analysis of related species  
312 showed that yellow catfish diverged ~81.9 MYA from the common ancestor of the channel  
313 catfish. Expanded gene families were significantly enriched in several important biological  
314 pathways, mainly in immune system and signal transduction, and important functional  
315 gene in those pathways were identified for following studies. Given the economic  
316 importance of yellow catfish and the increasing research interests for the species, the  
317 genomic data in this work offered valuable resource for functional gene investigations of  
318 yellow catfish. Furthermore, the chromosomal assembly of yellow catfish also provides  
319 valuable data for evolutionary studies for the research community in general.

320

321

## 322 Availability of supporting data

323 The raw sequencing and physical mapping data are available from NCBI via the  
324 accession number of SRR7817079, SRR7817060 and SRR7818403 via the project  
325 PRJNA489116; as well as the National Omics Data Encyclopedia  
326 (NODE) (<http://www.biosino.org/node/index>) via the project ID OEP000129  
327 (<http://www.biosino.org/node/project/detail/OEP000129>). The genome, annotation and  
328 intermediate files and results are also available via the *GigaScience* GigaDB repository<sup>49</sup>.  
329 All supplementary figures and tables are provided in Supplemental Table 1-3 and  
330 Supplementary Figure 1-5.

331

## 332 Software and URLs

| Software      | <a href="#">URLs</a>                                                                                                            |
|---------------|---------------------------------------------------------------------------------------------------------------------------------|
| HTQC          | <a href="https://sourceforge.net/projects/htqc/">https://sourceforge.net/projects/htqc/</a>                                     |
| Falcon        | <a href="https://github.com/PacificBiosciences/FALCON/wiki/Manual">https://github.com/PacificBiosciences/FALCON/wiki/Manual</a> |
| Canu          | <a href="https://github.com/marbl/canu">https://github.com/marbl/canu</a>                                                       |
| GMP           | <a href="https://github.com/Jianwei-Zhang/LIMS">https://github.com/Jianwei-Zhang/LIMS</a>                                       |
| Pilon         | <a href="https://github.com/broadinstitute/pilon/">https://github.com/broadinstitute/pilon/</a>                                 |
| Bowtie        | <a href="http://bowtie-bio.sourceforge.net/index.shtml">http://bowtie-bio.sourceforge.net/index.shtml</a>                       |
| Hiclib        | <a href="https://bitbucket.org/mirnylab/hiclib/src">https://bitbucket.org/mirnylab/hiclib/src</a>                               |
| Lachesis      | <a href="https://github.com/shendurelab/LACHESIS">https://github.com/shendurelab/LACHESIS</a>                                   |
| Juicebox      | <a href="https://www.aidenlab.org/juicebox/">https://www.aidenlab.org/juicebox/</a>                                             |
| BUSCO         | <a href="https://busco.ezlab.org/">https://busco.ezlab.org/</a>                                                                 |
| BWA           | <a href="http://bio-bwa.sourceforge.net/">http://bio-bwa.sourceforge.net/</a>                                                   |
| GATK          | <a href="https://software.broadinstitute.org/gatk/">https://software.broadinstitute.org/gatk/</a>                               |
| RepeatModeler | <a href="http://www.repeatmasker.org/RepeatModeler.html">http://www.repeatmasker.org/RepeatModeler.html</a>                     |
| RepeatMasker  | <a href="http://repeatmasker.org/">http://repeatmasker.org/</a>                                                                 |
| Augustus      | <a href="https://ngs.csr.uky.edu/Augustus">https://ngs.csr.uky.edu/Augustus</a>                                                 |
| Balst         | <a href="https://blast.ncbi.nlm.nih.gov/Blast.cgi">https://blast.ncbi.nlm.nih.gov/Blast.cgi</a>                                 |
| TopHat        | <a href="https://ccb.jhu.edu/software/tophat/index.shtml">https://ccb.jhu.edu/software/tophat/index.shtml</a>                   |
| Cufflinks     | <a href="http://cole-trapnell-lab.github.io/cufflinks/">http://cole-trapnell-lab.github.io/cufflinks/</a>                       |
| MAKER         | <a href="http://www.yandell-lab.org/software/maker.html">http://www.yandell-lab.org/software/maker.html</a>                     |
| Blast2GO      | <a href="https://www.blast2go.com/">https://www.blast2go.com/</a>                                                               |
| OrthMCL       | <a href="https://github.com/apetkau/orthomcl-pipeline">https://github.com/apetkau/orthomcl-pipeline</a>                         |
| MUSCLE        | <a href="http://www.drive5.com/muscle/">http://www.drive5.com/muscle/</a>                                                       |
| PhyML         | <a href="https://github.com/stephaneguindon/phyml">https://github.com/stephaneguindon/phyml</a>                                 |
| TimeTree      | <a href="http://timetree.org/">http://timetree.org/</a>                                                                         |
| PAML          | <a href="http://abacus.gene.ucl.ac.uk/software/paml.html">http://abacus.gene.ucl.ac.uk/software/paml.html</a>                   |

333

334 **Abbreviations**

335 3C: Capturing Chromosome Conformation; bp: base-pair; BUSCO: Benchmarking  
336 Universal Single-Copy Orthologs; CDS: Coding DNA Sequences; Gb: Gigabase; GO:  
337 Gene Ontology; Kb: kilobase; KEGG: Kyoto Encyclopedia of Genes and Genomes; Mb:  
338 megabase; Mya: Million years ago; PE: paired-end; TE: Transposable Element.

340 **Competing interests**

341 The authors declare that they have no competing interests.

343 **Funding**

344 This work was supported by China Agriculture Research System (CARS-46) and the  
345 Fundamental Research Funds for the Central Universities (2662017PY013).

347 **Author Contributions**

348 Jie Mei, Jian-Fang Gui and Nansheng Chen conceived the study; Dan Chen, Jicheng  
349 Zhang, Wenjie Guo and Peipei Huang collected the samples and performed sequencing  
350 and Hi-C experiments; Shijun Xiao, Gaorui Gong and Yan He estimated the genome size  
351 and assembled the genome; Shijun Xiao, Gaorui Gong and Xiaohui Li assessed the  
352 assembly quality; Gaorui Gong, Shijun Xiao, Yang Xiong and Junjie Wu carried out the  
353 genome annotation and functional genomic analysis, Jie Mei, Nansheng Chen, Shijun  
354 Xiao, Gaorui Gong and Jian-Fang Gui wrote the manuscript. And all authors read, edited,  
355 and approved the final manuscript.

357 **References**

- 358 1 Liu, H. *et al.* Genetic manipulation of sex ratio for the large-scale breeding of YY super-male  
359 and XY all-male yellow catfish (*Pelteobagrus fulvidraco* (Richardson)). *Marine Biotechnology*  
360 **15**, 321-328 (2013).
- 361 2 Zhang, J. *et al.* Characterization and development of EST-SSR markers derived from  
362 transcriptome of yellow catfish. *Molecules* **19**, 16402-16415 (2014).
- 363 3 Liu, F. *et al.* Effects of astaxanthin and emodin on the growth, stress resistance and disease  
364 resistance of yellow catfish (*Pelteobagrus fulvidraco*). *Fish & Shellfish Immunology* **51**, 125  
365 (2016).

1 366 4 Jie, M. & Gui, J. F. Genetic basis and biotechnological manipulation of sexual dimorphism and  
2 367 sex determination in fish. *Science China Life Sciences* **58**, 124 (2015).

3 368 5 Chen, X. *et al.* A comprehensive transcriptome provides candidate genes for sex  
4 369 determination/differentiation and SSR/SNP markers in yellow catfish. *Marine Biotechnology*  
5 370 **17**, 190-198 (2015).

6 371 6 Dan, C., Mei, J., Wang, D. & Gui, J. F. Genetic Differentiation and Efficient Sex-specific Marker  
7 372 Development of a Pair of Y- and X-linked Markers in Yellow Catfish. *International Journal of*  
8 373 *Biological Sciences* **9**, 1043-1049 (2013).

9 374 7 Tian-Yi YANG, Y. X., Cheng DAN, Wen-Jie Guo, Han-Qin LIU, Jian-Fang GUI, Jie MEI. .  
10 375 Production of XX male yellow catfish by sex-reversal technology. *Acta Hydrobiologica Sinica*  
11 376 **42**, 871–878 (2018).

12 377 8 Dan, C., Lin, Q., Gong, G., *et al.* A novel PDZ domain-containing gene is essential for male sex  
13 378 differentiation and maintenance in yellow catfish (*Pelteobagrus fulvidraco*). *Science Bulletin*  
14 379 (2018). doi: 10.1016/j.scib.2018.08.012

15 380 9 Xiao, S. *et al.* Whole-genome single-nucleotide polymorphism (SNP) marker discovery and  
16 381 association analysis with the eicosapentaenoic acid (EPA) and docosahexaenoic acid (DHA)  
17 382 content in *Larimichthys crocea*. *PeerJ* **4**, e2664 (2016).

18 383 10 Yang, X. *et al.* HTQC: a fast quality control toolkit for Illumina sequencing data. *Bmc*  
19 384 *Bioinformatics* **14**, 1-4 (2013).

20 385 11 Xu, P. *et al.* Genome sequence and genetic diversity of the common carp, *Cyprinus carpio*.  
21 386 *Nature Genetics* **46**, 1212-1219 (2014).

22 387 12 Chin, C. S. *et al.* Phased Diploid Genome Assembly with Single Molecule Real-Time  
23 388 Sequencing. *Nature Methods* **13**, 1050 (2016).

24 389 13 Koren, S. *et al.* Canu: scalable and accurate long-read assembly via adaptive k-mer weighting  
25 390 and repeat separation. *Genome Research* **27**, 722 (2017).

26 391 14 Zhang, J. *et al.* Genome puzzle master (GPM): an integrated pipeline for building and editing  
27 392 pseudomolecules from fragmented sequences. *Bioinformatics* **32**, 3058-3064,  
28 393 doi:10.1093/bioinformatics/btw370 (2016).

29 394 15 Zhang, J. *et al.* Extensive sequence divergence between the reference genomes of two elite  
30 395 indica rice varieties Zhenshan 97 and Minghui 63. *Proc Natl Acad Sci U S A* **113**, E5163 (2016).

31 396 16 Chin, C. S. *et al.* Nonhybrid, finished microbial genome assemblies from long-read SMRT  
32 397 sequencing data. *Nature Methods* **10**, 563 (2013).

33 398 17 Walker, B. J. *et al.* Pilon: An Integrated Tool for Comprehensive Microbial Variant Detection  
34 399 and Genome Assembly Improvement. *Plos One* **9**, e112963 (2014).

35 400 18 Lieberman-Aiden, E. & Dekker, J. Comprehensive Mapping of Long-Range Interactions Reveals  
36 401 Folding Principles of the Human Genome. *Science* **326**, 289 (2009).

37 402 19 Belaghzal, H., Dekker, J. & Gibcus, J. H. Hi-C 2.0: An optimized hi-c procedure for  
38 403 high-resolution genome-wide mapping of chromosome conformation. *Methods* **123**, 56-65  
39 404 (2017).

40 405 20 Dudchenko, O. *et al.* De novo assembly of the *Aedes aegypti* genome using Hi-C yields  
41 406 chromosome-length scaffolds. *Science* **356**, 92 (2017).

42 407 21 Langmead, B., Trapnell, C., Pop, M. & Salzberg, S. L. Ultrafast and memory-efficient alignment  
43 408 of short DNA sequences to the human genome. *Genome Biology* **10**, R25 (2009).

44 409 22 Nicolas, S. *et al.* HiC-Pro: an optimized and flexible pipeline for Hi-C data processing. *Genome*

1 410 *Biology* **16**, 259 (2015).

2 411 23 Xie, T., Yang, Q. Y., Wang, X. T., Mclysaght, A. & Zhang, H. Y. Spatial Colocalization of Human

3 412 Ohnolog Pairs Acts to Maintain Dosage-Balance. *Molecular Biology & Evolution* **33**,

4 413 2368-2375 (2016).

5 414 24 Burton, J. N. *et al.* Chromosome-scale scaffolding of de novo genome assemblies based on

6 415 chromatin interactions. *Nature Biotechnology* **31**, 1119-1125 (2013).

7 416 25 Shu-qun, X. Karyotype analyses of *Pseudobagrus fulvidraco*. *Chinese Journal of Fisheries*

8 417 (2006).

9 418 26 Dudchenko, O. *et al.* The Juicebox Assembly Tools module facilitates de novo assembly of

10 419 mammalian genomes with chromosome-length scaffolds for under \$1000. (2018). bioRxiv

11 420 254797; doi: <https://doi.org/10.1101/254797>

12 421 27 Simão, F. A., Waterhouse, R. M., Ioannidis, P., Kriventseva, E. V. & Zdobnov, E. M. BUSCO:

13 422 assessing genome assembly and annotation completeness with single-copy orthologs.

14 423 *Bioinformatics* **31**, 3210 (2015).

15 424 28 Mckenna, A. *et al.* The Genome Analysis Toolkit: A MapReduce framework for analyzing

16 425 next-generation DNA sequencing data. *Genome Research* **20**, 1297-1303 (2010).

17 426 29 Benson, G. Tandem repeats finder: a program to analyze DNA sequences. *Nucleic Acids*

18 427 *Research* **27**, 573 (1999).

19 428 30 Bao, W., Kojima, K. K. & Kohany, O. Repbase Update, a database of repetitive elements in

20 429 eukaryotic genomes. *Mobile Dna* **6**, 11 (2015).

21 430 31 Chen, N. Using RepeatMasker to identify repetitive elements in genomic sequences. *Current*

22 431 *Protocols in Bioinformatics* **Chapter 4**, Unit 4.10 (2004).

23 432 32 Stanke, M. *et al.* AUGUSTUS: ab initio prediction of alternative transcripts. *Nucleic Acids*

24 433 *Research* **34**, 435-439 (2006).

25 434 33 Flicek, P. *et al.* Ensembl 2014. *Nucleic Acids Research* **42**, D749-D755 (2014).

26 435 34 Gertz, E. M. *et al.* Composition-based statistics and translated nucleotide searches: Improving

27 436 the TBLASTN module of BLAST. *Bmc Biology* **4**, 41 (2006).

28 437 35 Trapnell, C., Pachter, L. & Salzberg, S. L. TopHat: discovering splice junctions with RNA-Seq.

29 438 *Bioinformatics* **25**, 1105-1111 (2009).

30 439 36 Ghosh, S. & Chan, C. K. K. Analysis of RNA-Seq Data Using TopHat and Cufflinks. *Methods in*

31 440 *Molecular Biology* **1374**, 339 (2016).

32 441 37 Campbell, M. S., Holt, C., Moore, B. & Yandell, M. Genome Annotation and Curation Using

33 442 MAKER and MAKER-P. *Current Protocols in Bioinformatics* **48**, 4.11.11 (2014).

34 443 38 Altschul, S. F., Gish, W., Miller, W., Myers, E. W. & Lipman, D. J. Basic local alignment search

35 444 tool. *Journal of Molecular Biology* **215**, 403-410 (1990).

36 445 39 Harris, M. A. *et al.* The Gene Ontology (GO) database and informatics resource. *Nucleic Acids*

37 446 *Research* **32**, D258-261, doi:10.1093/nar/gkh036 (2004).

38 447 40 Ogata, H. *et al.* KEGG: Kyoto Encyclopedia of Genes and Genomes. *Nucleic Acids Research* **27**,

39 448 29-34 (2000).

40 449 41 Conesa, A. *et al.* Blast2GO: a universal tool for annotation, visualization and analysis in

41 450 functional genomics research. *Bioinformatics* **21**, 3674 (2005).

42 451 42 Li, L., Stoeckert, C. J. & Roos, D. S. OrthoMCL: Identification of Ortholog Groups for Eukaryotic

43 452 Genomes. *Genome Research* **13**, 2178-2189 (2003).

44 453 43 Thompson, J. D., Gibson, T. J. & Higgins, D. G. *Multiple Sequence Alignment Using ClustalW*

454 *and ClustalX*. (John Wiley & Sons, Inc., 2002).

455 44 Guindon, S., Dufayard, J. F., Hordijk, W., Lefort, V. & Gascuel, O. PhyML: Fast and Accurate  
 456 Phylogeny Reconstruction by Maximum Likelihood. **9**, 384-385 (2009).

457 45 Hedges, S. B., Dudley, J. & Kumar, S. TimeTree: a public knowledge-base of divergence times  
 458 among organisms. *Bioinformatics* **22**, 2971-2972 (2006).

459 46 Yang, Z. PAML: a program package for phylogenetic analysis by maximum likelihood.  
 460 *Computer Applications in Bioscience* **13**, 555-556 (1997).

461 47 Liu, Z. *et al.* The channel catfish genome sequence provides insights into the evolution of  
 462 scale formation in teleosts. *Nature Communications* **7**, 11757 (2016).

463 48 De Bie, T., Cristianini, N., Demuth, J. P. & Hahn, M. W. CAFE: a computational tool for the  
 464 study of gene family evolution. *Bioinformatics* **22**, 1269-1271 (2006).

465 49. Gong, G., Dan, C., Xiao, S. *et al.*, Supporting data for " Chromosomal-level assembly of yellow  
 466 catfish genome using third-generation DNA sequencing and Hi-C analysis". GigaScience  
 467 Database, 2018. <http://dx.doi.org/10.5524/100506>

## 470 Tables and Figures

### 471 Tables

472 **Table 1. Sequencing data generated for yellow catfish genome assembly and**  
 473 **annotation.** Note that paired-end 150 bp reads was generated from the Illumina HiSeq X  
 474 Ten platform.

| Library type | Platform      | Library size (bp) | Data size (Gb) | Application                                  |
|--------------|---------------|-------------------|----------------|----------------------------------------------|
| Short reads  | HiSeq X Ten   | 250               | 51.2           | genome survey and<br>genomic base correction |
| Long reads   | PacBio SEQUEL | 20,000            | 38.9           | genome assembly                              |
| Hi-C         | HiSeq X Ten   | 250               | 146.1          | chromosome construction                      |

475  
 476 **Table 2. Statistics for genome assembly of yellow catfish.** Note that contigs were analyzed  
 477 after the scaffolding based on Hi-C data.

| Sample ID | Length       |              | Number   |          |
|-----------|--------------|--------------|----------|----------|
|           | Contig**(bp) | Scaffold(bp) | Contig** | Scaffold |
| Total     | 731,603,425  | 732,815,925  | 3,652    | 1,227    |
| Max       | 11,531,338   | 55,095,979   | -        | -        |
| N50       | 1,111,198    | 25,785,924   | 126      | 11       |
| N60       | 643,552      | 24,806,204   | 212      | 14       |



|            |         |            |       |    |
|------------|---------|------------|-------|----|
| <b>N70</b> | 333,994 | 22,397,207 | 373   | 17 |
| <b>N80</b> | 128,419 | 21,591,549 | 742   | 21 |
| <b>N90</b> | 59,682  | 16,750,011 | 1,634 | 25 |

478

479

480

481

482

483 **Table 3. Statistics for genome annotation of yellow catfish.** Note that the e-value threshold  
 484 of the 1e-5 was applied during the homolog searching for the functional annotation.

| Database  | Number | Percent |
|-----------|--------|---------|
| InterPro  | 20,178 | 82.18   |
| GO        | 14,936 | 60.83   |
| KEGG ALL  | 24,025 | 97.85   |
| KEGG KO   | 13,951 | 56.82   |
| Swissprot | 20,875 | 85.02   |
| TrEMBL    | 24,093 | 98.13   |
| NR        | 24,308 | 99.01   |
| Total     | 24,552 |         |

485

## 486 Figures

487 **Figure 1. Picture of a yellow catfish, *Pelteobagrus fulvidraco*.** The fish was collected  
 488 from the breeding center of Huazhong Agricultural University in Wuhan City, Hubei Province,  
 489 China.

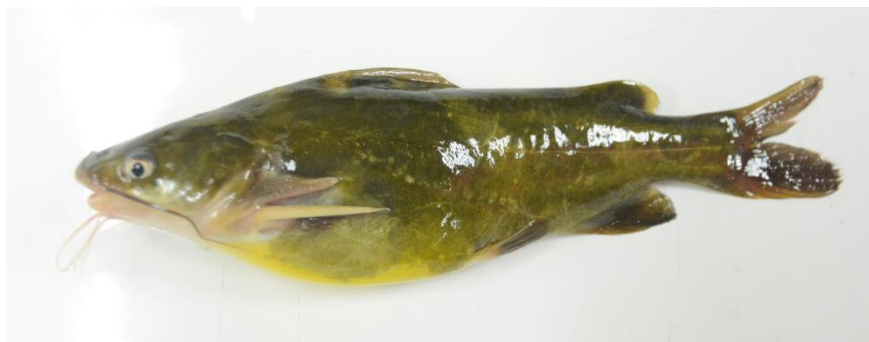

490

491

1  
2  
3  
4  
5  
6  
7  
8  
9  
10  
11  
12  
13  
14  
15  
16  
17  
18  
19  
20  
21  
22  
23  
24  
25  
26  
27  
28  
29  
30  
31  
32  
33  
34  
35  
36  
37  
38  
39  
40  
41  
42  
43  
44  
45  
46  
47  
48  
49  
50  
51  
52  
53  
54  
55  
56  
57  
58  
59  
60  
61  
62  
63  
64  
65

492 **Figure 2. Yellow catfish genome contig contact matrix using Hi-C data.** The color bar  
493 illuminated the logarithm of the contact density from red (high) to white (low) in the plot. Note  
494 that only sequences anchored on chromosomes were shown in the plot.

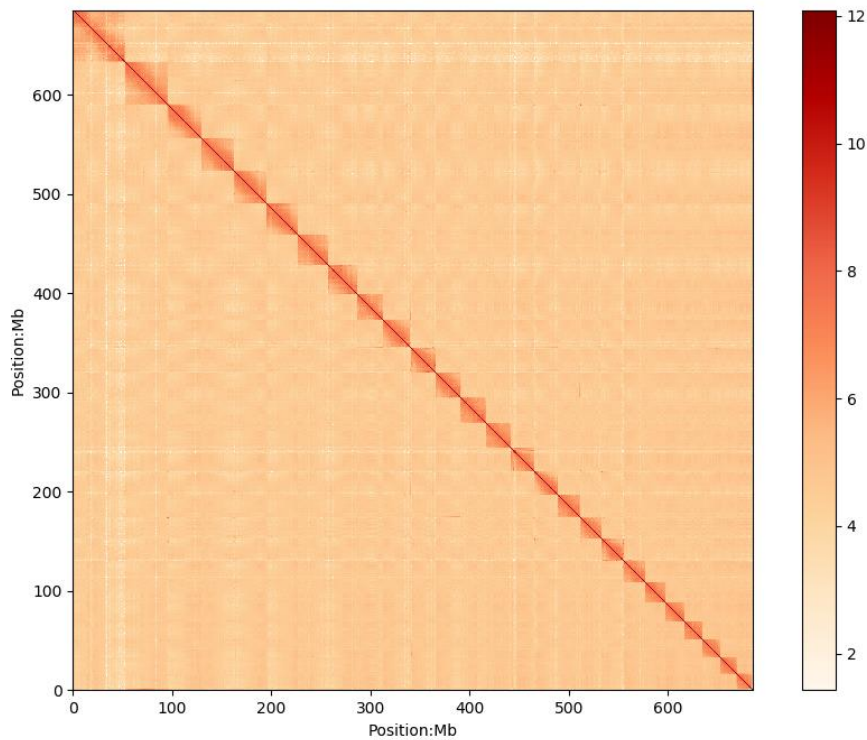

495  
496  
497  
498  
499

500 **Figure 3. Genome assembly comparison of yellow catfish with other public teleost**  
501 **genomes.** X and Y axis representing the contig and scaffold N50's, respectively. The  
502 genomes sequenced with third generation sequencing were highlighted in red.

1  
2  
3  
4  
5  
6  
7  
8  
9  
10  
11  
12  
13  
14  
15  
16  
17  
18  
19  
20  
21  
22  
23  
24  
25  
26  
27  
28  
29  
30  
31  
32  
33  
34  
35  
36  
37  
38  
39  
40  
41  
42  
43  
44  
45  
46  
47  
48  
49  
50  
51  
52  
53  
54  
55  
56  
57  
58  
59  
60  
61  
62  
63  
64  
65

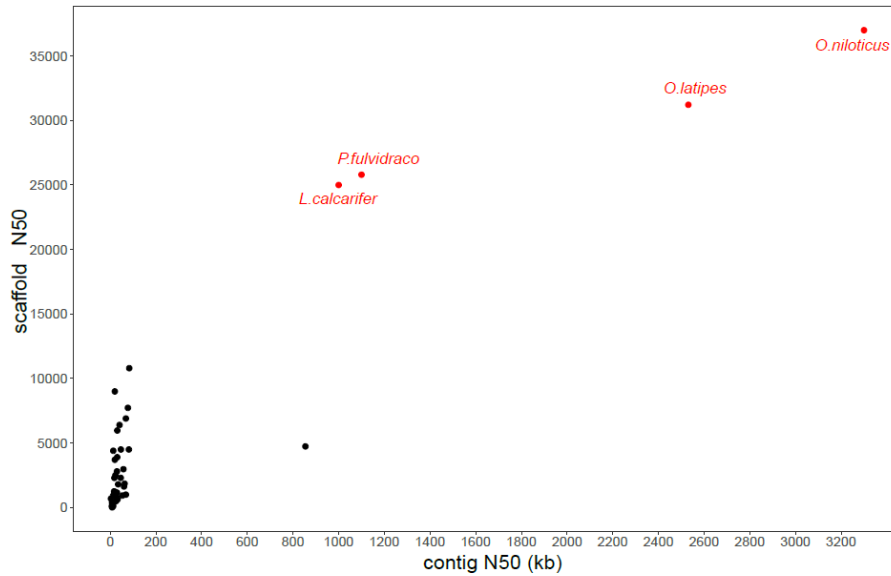

503

504

505 **Figure 4. Length distribution comparison on total gene, CDS, exon and intron of**  
 506 **annotated gene models of the yellow catfish with other closely related teleost fish**  
 507 **species.** Length distribution of total gene (A), CDS (B), exon (C) and intron (D) were  
 508 compared to *P. fulvidraco*, *D. rerio*, *G. aculeatus*, *O. latipes*, *I. punctatus* and *T. rubripes*.

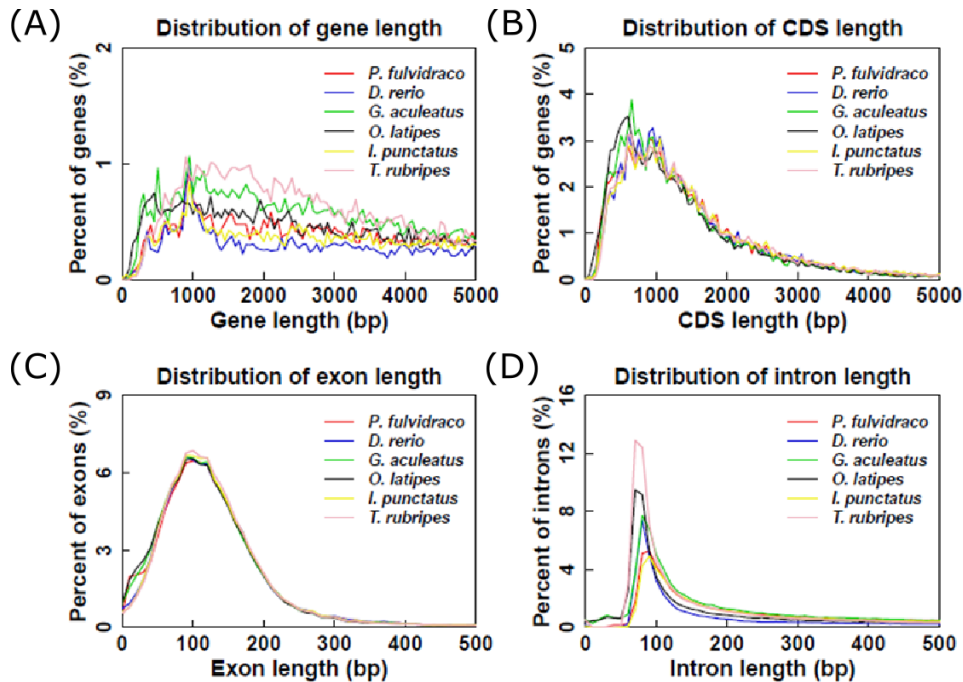

509

510

511 **Figure 5. Phylogenetic analysis of the yellow catfish with other teleost species.** The  
 512 estimated species divergence time (MYA) and the 95% confidential intervals were labeled at  
 513 each branch site. The divergence used for time recalibration was illuminated as red dots in the

1  
2  
3  
4  
5  
6  
7  
8  
9  
10  
11  
12  
13  
14  
15  
16  
17  
18  
19  
20  
21  
22  
23  
24  
25  
26  
27  
28  
29  
30  
31  
32  
33  
34  
35  
36  
37  
38  
39  
40  
41  
42  
43  
44  
45  
46  
47  
48  
49  
50  
51  
52  
53  
54  
55  
56  
57  
58  
59  
60  
61  
62  
63  
64  
65

514 tree. The fish (*I. punctatus* and *P. fulvidraco*) from the order Siluriformes were highlighted by  
 515 pink shading.

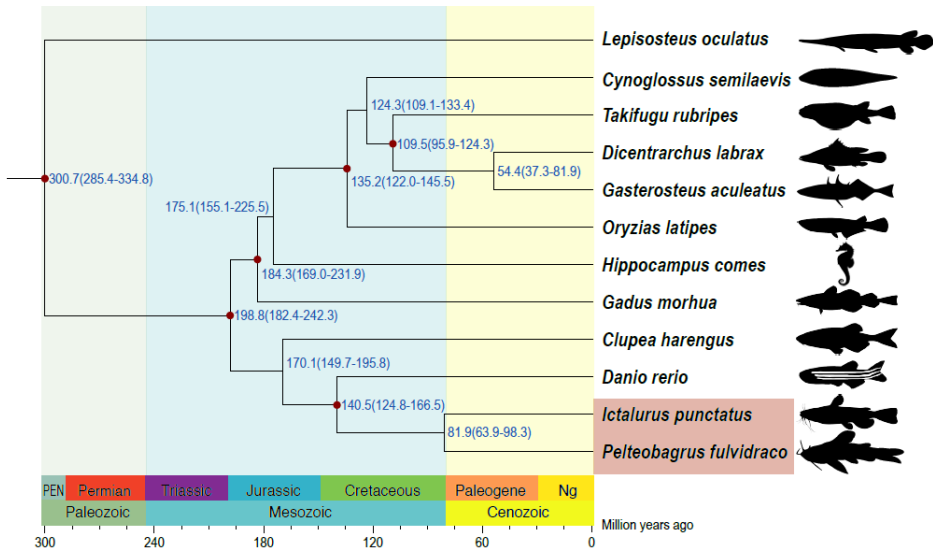

1  
2  
3  
4  
5  
6  
7  
8  
9  
10  
11  
12  
13  
14  
15  
16  
17  
18  
19  
20  
21  
22  
23  
24  
25  
26  
27  
28  
29  
30  
31  
32  
33  
34  
35  
36  
37  
38  
39  
40  
41  
42  
43  
44  
45  
46  
47  
48  
49  
50  
51  
52  
53  
54  
55  
56  
57  
58  
59  
60  
61  
62  
63  
64  
65

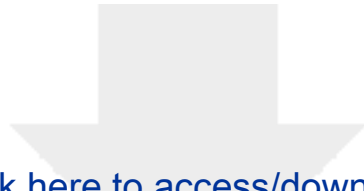

Click here to access/download  
**Supplementary Material**  
Supplementary information\_R1.docx

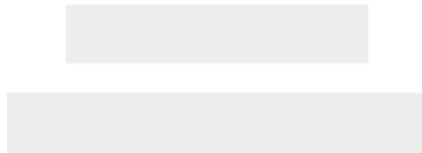

Supplement: giy120_giga-d-18-00234_revision_1.pdf [file giy120_giga-d-18-00234_revision_1.pdf]
